# Supplementary material
Source: PubMed Central journal article supplement (PMC4322433)

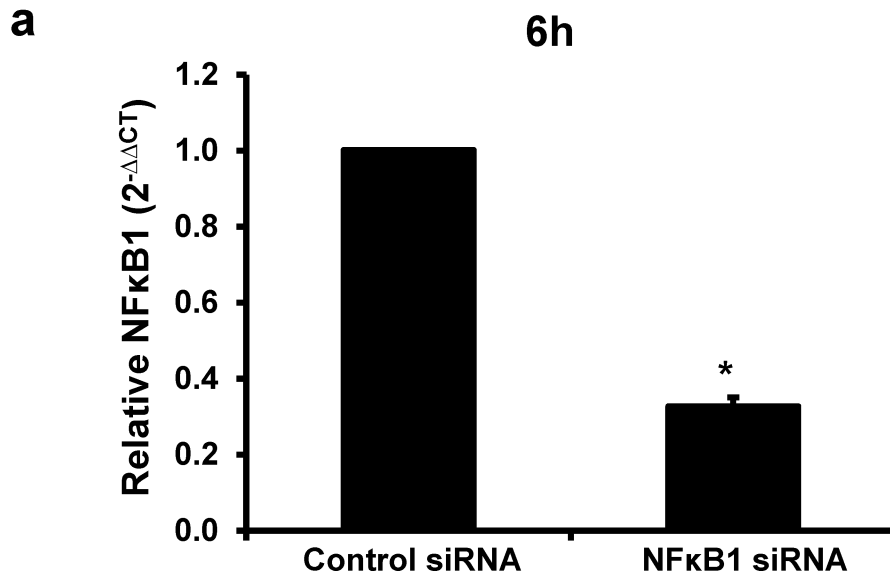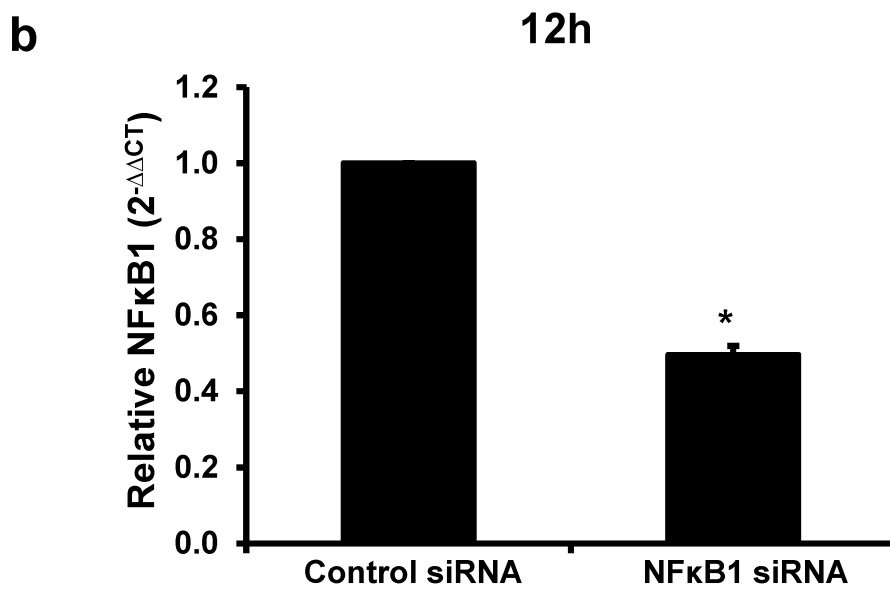

Taetzsch et al.  
Figure S2

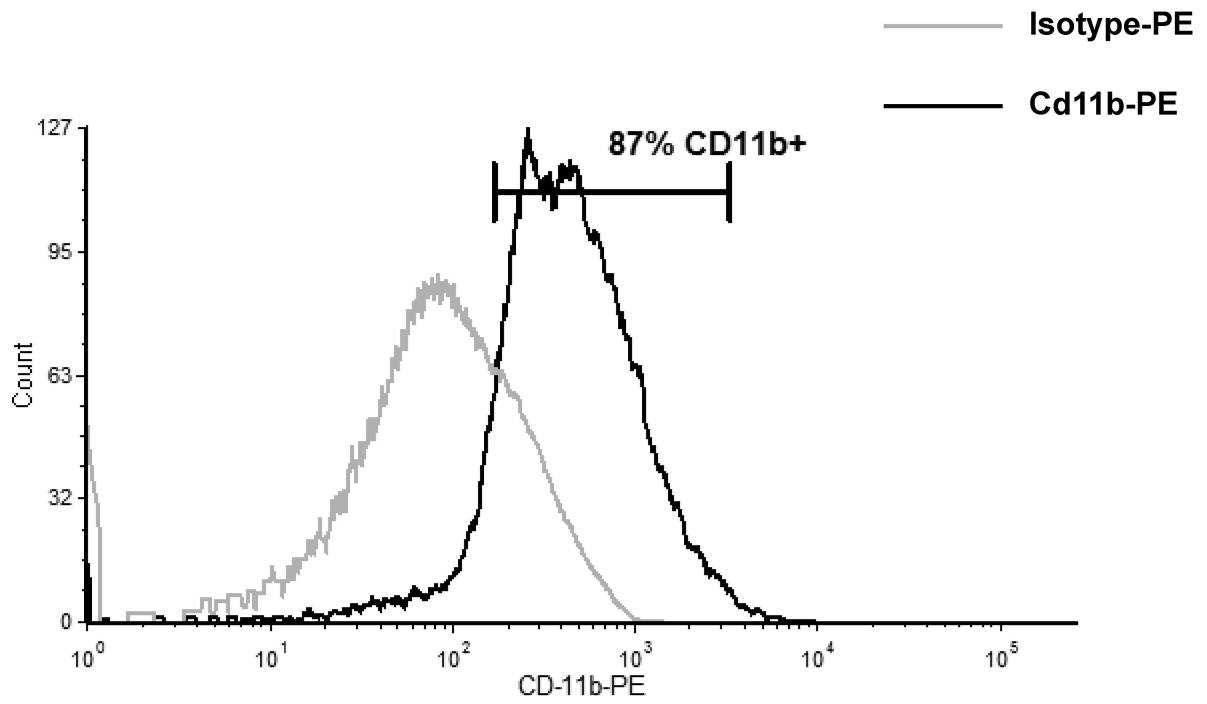

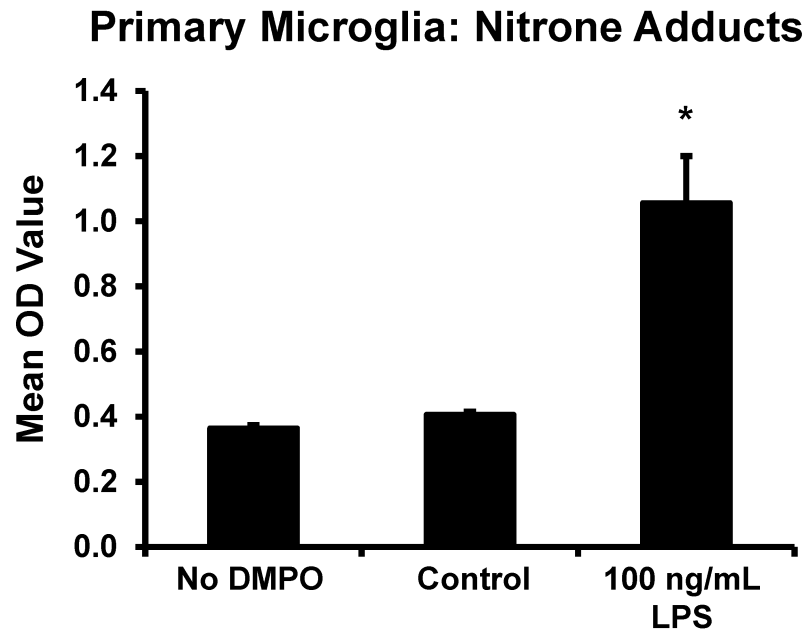

**a**

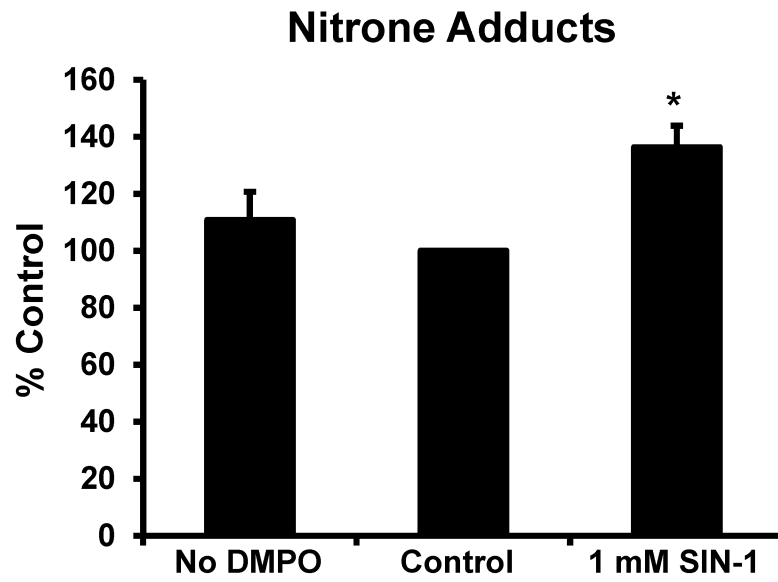

**b**

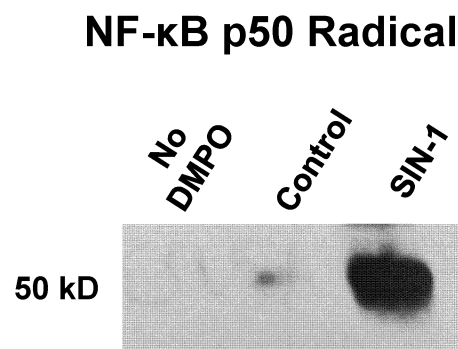

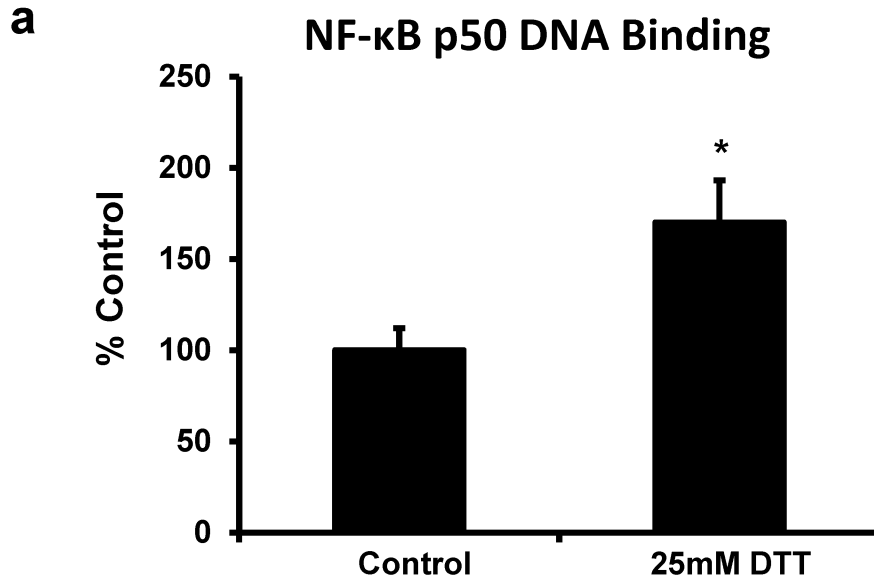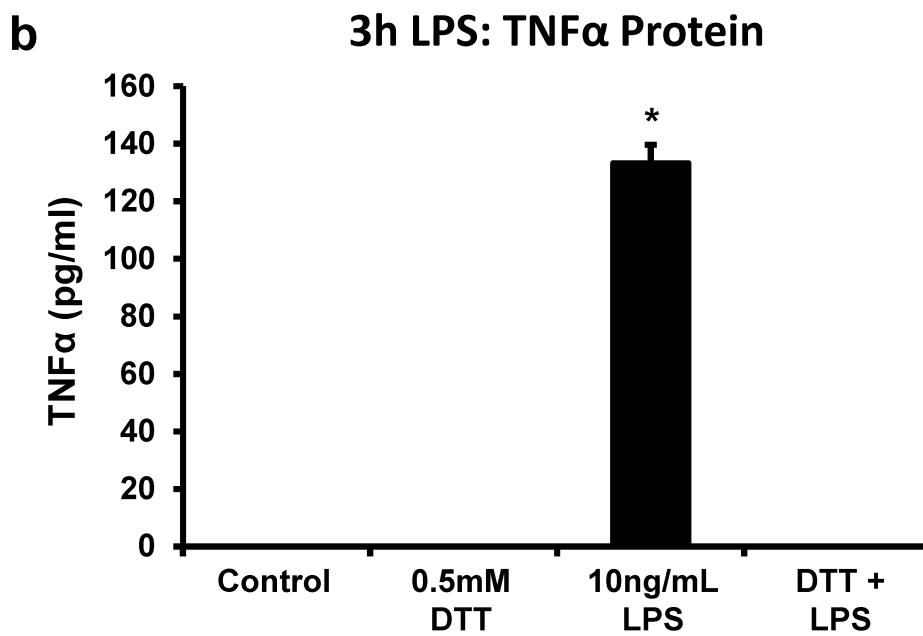

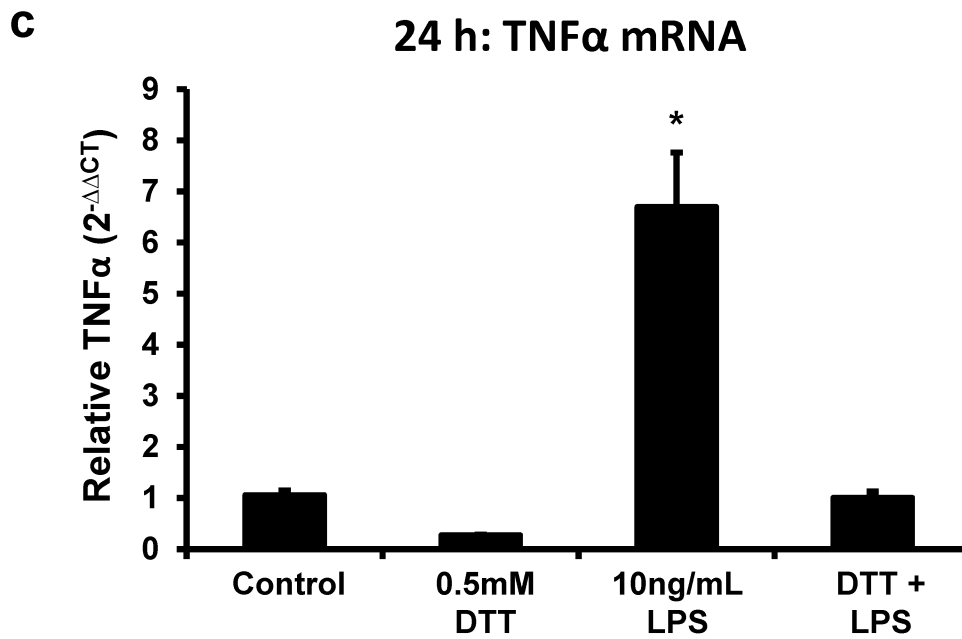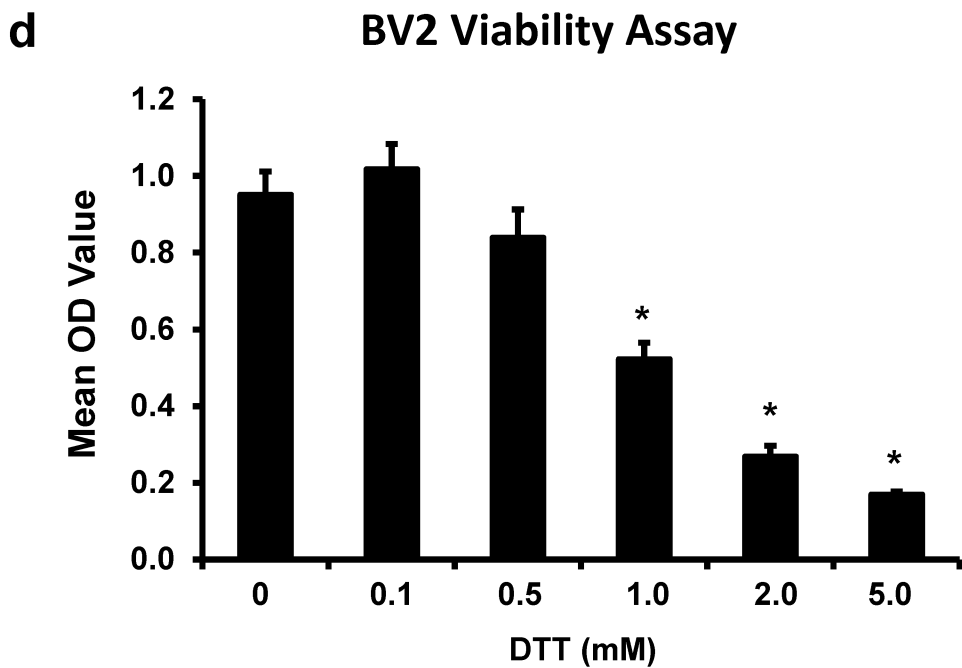

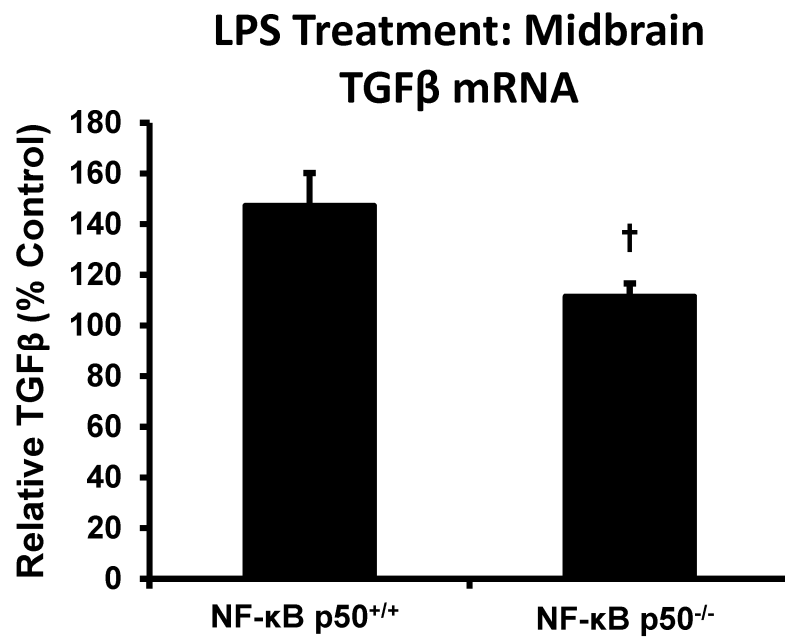

Supplement: NIHMS634061-supplement-Supp_FigureS1-S6.pdf [file NIHMS634061-supplement-Supp_FigureS1-S6.pdf]
